# Supplementary material for: Chemical Attachment of 5-Nitrosalicylaldimine Motif to Silatrane Resulting in an Organic–Inorganic Structure with High Medicinal Significance
Source: MDPI journal article supplement (doi:10.3390/pharmaceutics14122838), 2022-12-18
Supplement: s1 [file s1]

## Supplementary Materials

### Chemical attachment of 5-nitrosalicylaldimine motif to silatrane resulting in an organic-inorganic structure of high medicinal significance

Mirela-Fernanda Zaltariou, Mihaela Turtoi, Dragos Peptanariu, Ana-Maria Macsim, Lilia Clima, Corneliu Cojocaru, Nicoleta Vornicu, Bianca-Iulia Ciubotaru, Alexandra Bargan, Manuela Calin, Maria Cazacu

**Table S1.** Bond distances (Å) and angles (°) for **SIL BS**.

|           |           |             |           |
|-----------|-----------|-------------|-----------|
| Si1-O1    | 1.657(3)  | N2-C9       | 1.447(9)  |
| Si1-O2    | 1.665(4)  | N3-C13      | 1.430(11) |
| Si1-O3    | 1.667(4)  | C8-C9       | 1.532(8)  |
| Si1-N1    | 2.151(4)  | C8-C7       | 1.500(7)  |
| Si1-C7    | 1.877(5)  | C15-C14     | 1.319(11) |
| O6-C16    | 1.241(9)  | C15-C16     | 1.425(11) |
| O4-N3     | 1.206(10) | C10-C11     | 1.397(10) |
| O1-C2     | 1.408(6)  | C11-C12     | 1.377(10) |
| O2-C4     | 1.422(7)  | C11-C16     | 1.498(9)  |
| O3-C6     | 1.425(7)  | C1-C2       | 1.476(8)  |
| O5-N3     | 1.204(10) | C4-C3       | 1.474(9)  |
| N1-C1     | 1.447(8)  | C13-C14     | 1.404(10) |
| N1-C3     | 1.450(8)  | C13-C12     | 1.342(10) |
| N1-C5     | 1.451(7)  | C6-C5       | 1.464(9)  |
| N2-C10    | 1.271(8)  |             |           |
| O1-Si1-O2 | 117.2(2)  | C7-C8-C9    | 113.2(5)  |
| O1-Si1-O3 | 119.3(2)  | C14-C15-C16 | 123.4(7)  |
| O1-Si1-N1 | 83.11(16) | N2-C10-C11  | 127.9(6)  |
| O1-Si1-C7 | 98.3(2)   | C10-C11-C16 | 120.3(7)  |
| O2-Si1-O3 | 119.0(2)  | C12-C11-C10 | 122.7(7)  |
| O2-Si1-N1 | 82.99(17) | C12-C11-C16 | 117.0(8)  |
| O2-Si1-C7 | 97.8(2)   | N1-C1-C2    | 108.9(5)  |
| O3-Si1-N1 | 82.69(18) | O1-C2-C1    | 110.8(5)  |
| O3-Si1-C7 | 95.2(2)   | O2-C4-C3    | 110.2(5)  |
| C7-Si1-N1 | 177.8(2)  | C14-C13-N3  | 121.6(9)  |
| C2-O1-Si1 | 123.4(3)  | C12-C13-N3  | 118.5(8)  |
| C4-O2-Si1 | 123.1(3)  | C12-C13-C14 | 119.9(8)  |
| C6-O3-Si1 | 123.2(4)  | O3-C6-C5    | 109.8(5)  |
| C1-N1-Si1 | 105.1(3)  | N1-C3-C4    | 108.8(5)  |
| C1-N1-C3  | 112.4(6)  | N1-C5-C6    | 109.0(5)  |
| C1-N1-C5  | 114.2(6)  | C15-C14-C13 | 120.3(9)  |

|           |           |             |          |
|-----------|-----------|-------------|----------|
| C3-N1-Si1 | 105.3(3)  | N2-C9-C8    | 112.6(5) |
| C3-N1-C5  | 113.6(6)  | C8-C7-Si1   | 117.0(4) |
| C5-N1-Si1 | 105.1(4)  | C13-C12-C11 | 123.8(7) |
| C10-N2-C9 | 124.9(5)  | O6-C16-C15  | 124.3(7) |
| O4-N3-C13 | 121.6(9)  | O6-C16-C11  | 120.2(8) |
| O5-N3-O4  | 121.1(10) | C15-C16-C11 | 115.5(7) |
| O5-N3-C13 | 117.2(10) |             |          |

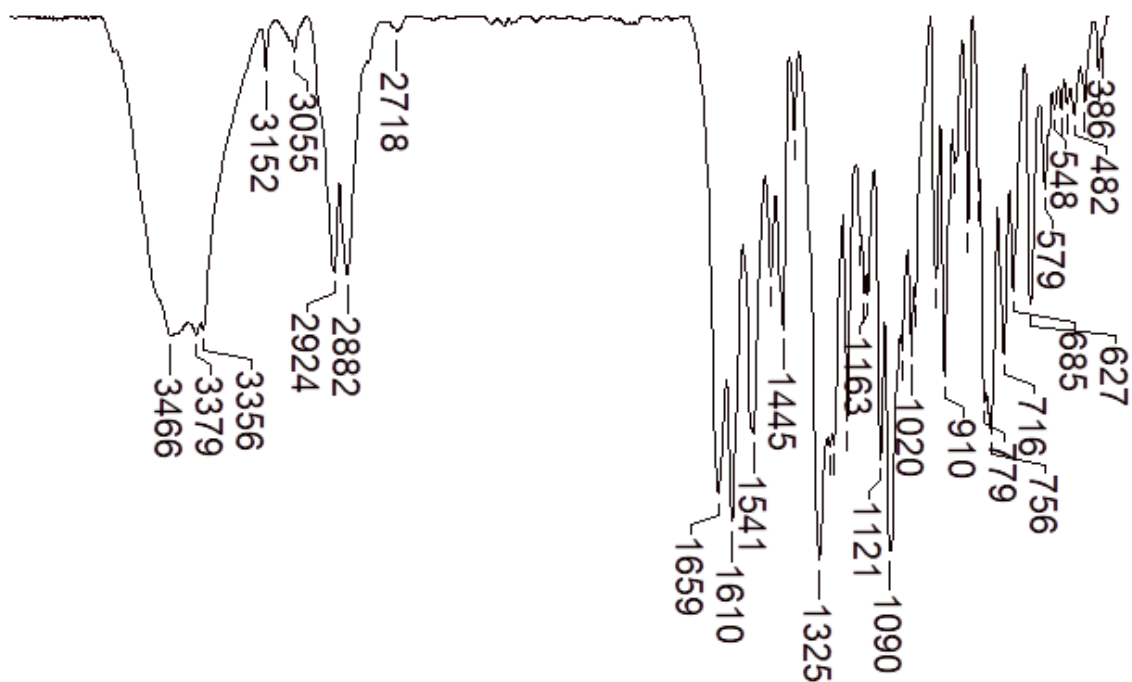

**Figure S1.** IR spectrum of SIL-BS.

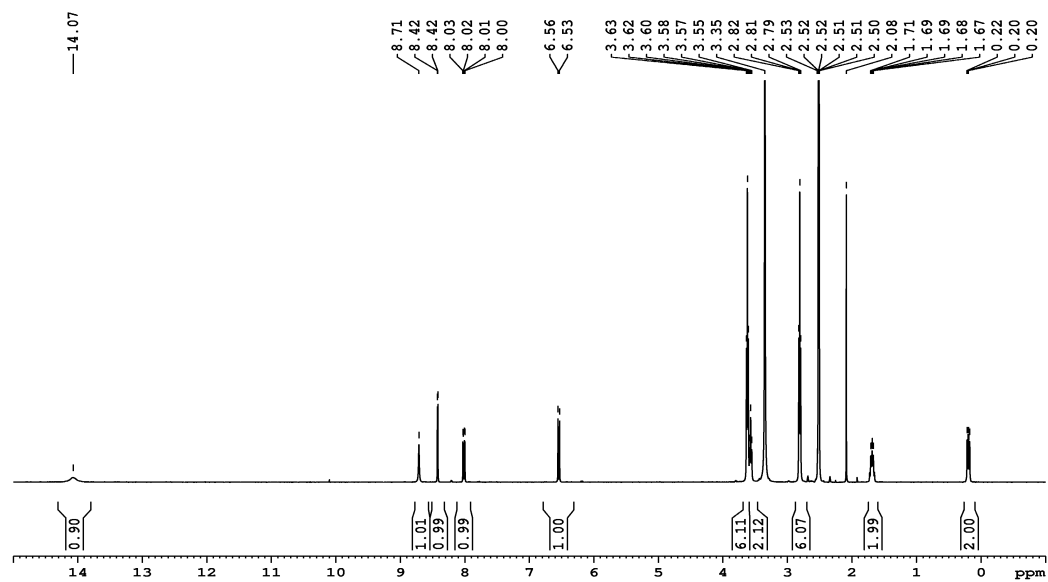

**Figure S2.** <sup>1</sup>H NMR spectrum of SIL-BS.

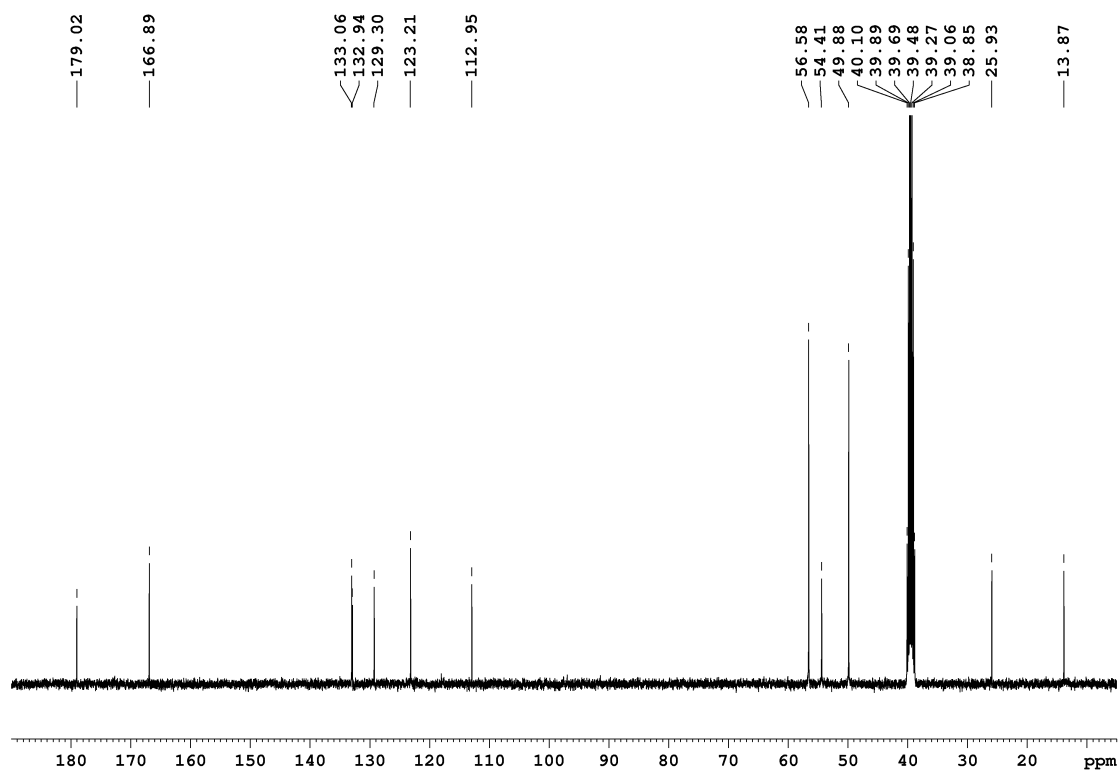

**Figure S3.** <sup>13</sup>C NMR spectrum of SIL-BS.

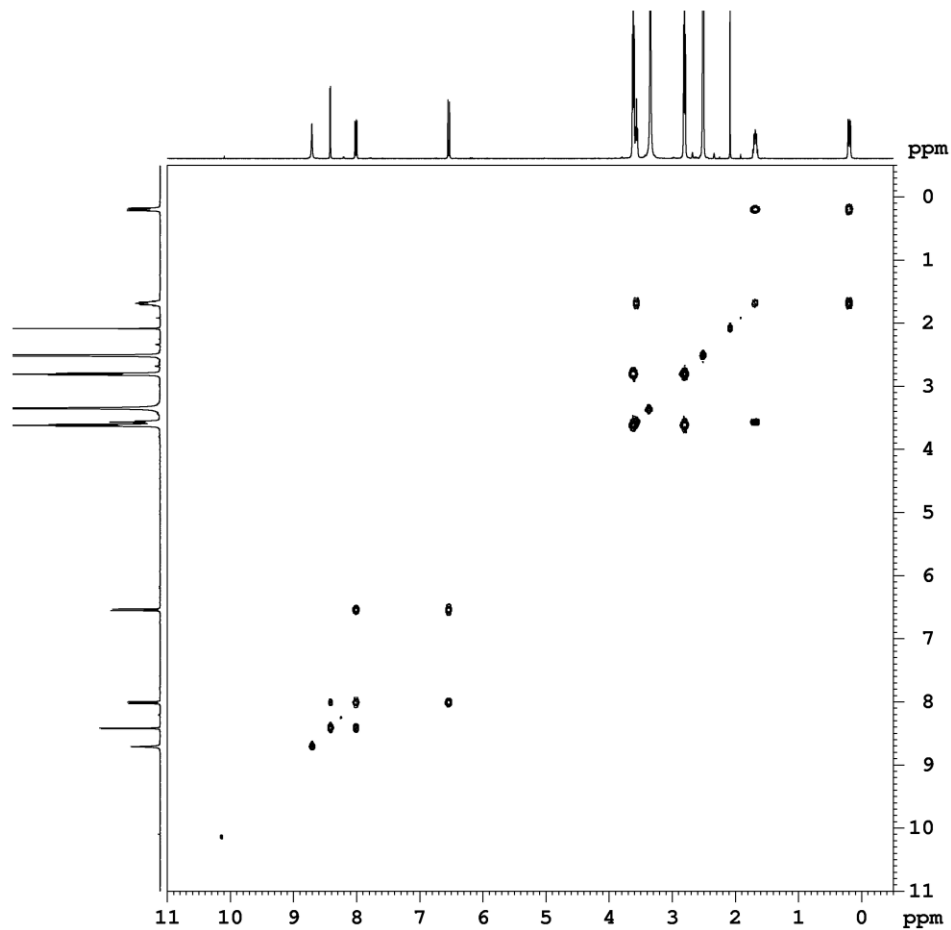

**Figure S4.**  $^1\text{H}$ ,  $^1\text{H}$  COSY NMR spectrum of SIL-BS.

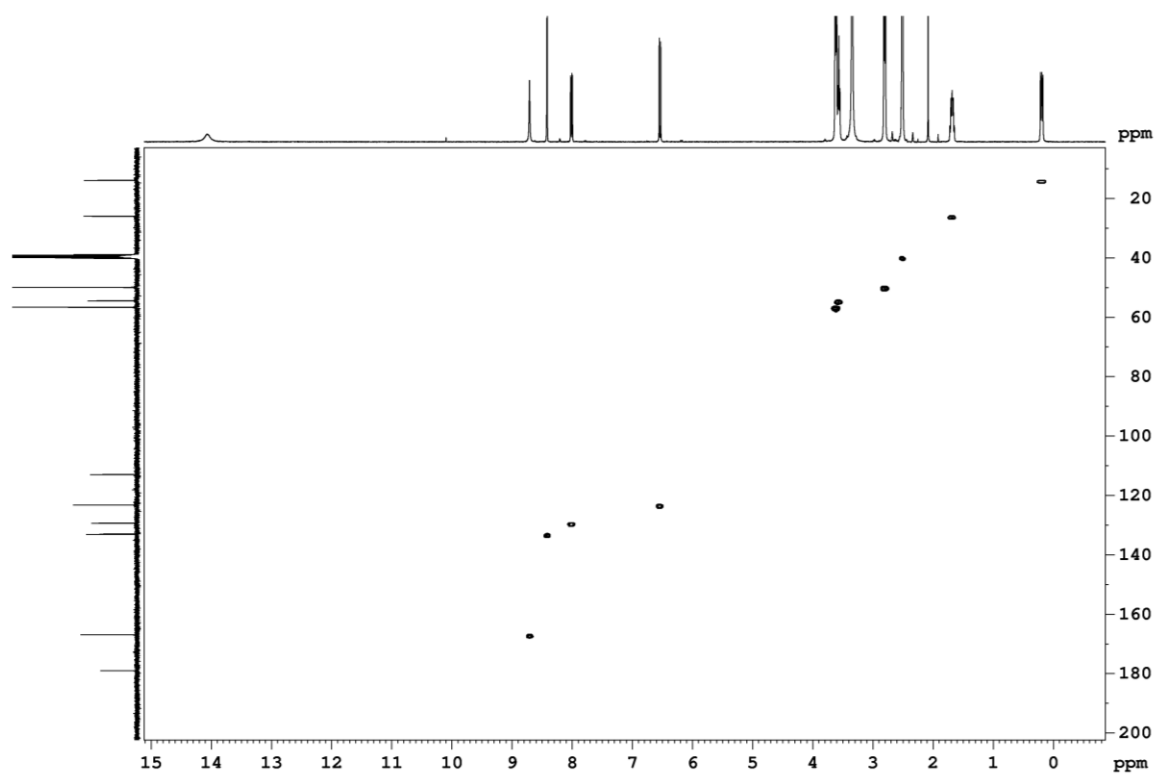

**Figure S5.** HSQC NMR spectrum of SIL-BS.

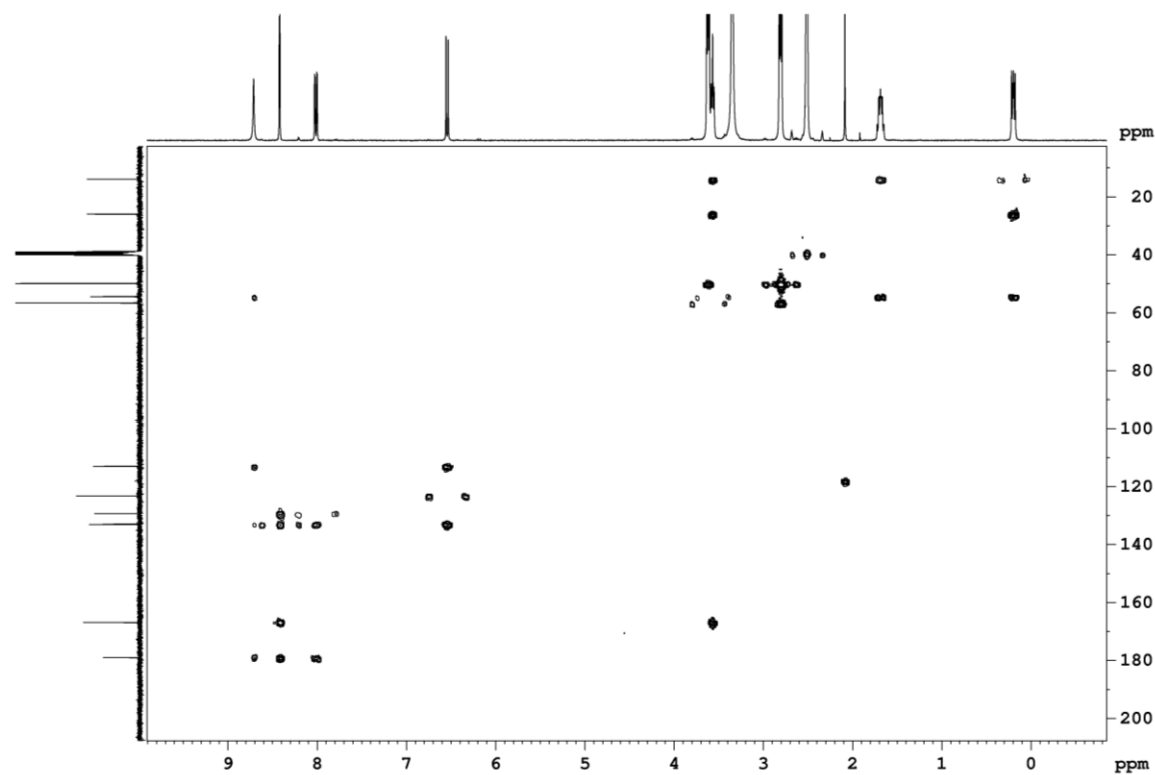

**Figure S6.** HMBC NMR spectrum of SIL-BS.

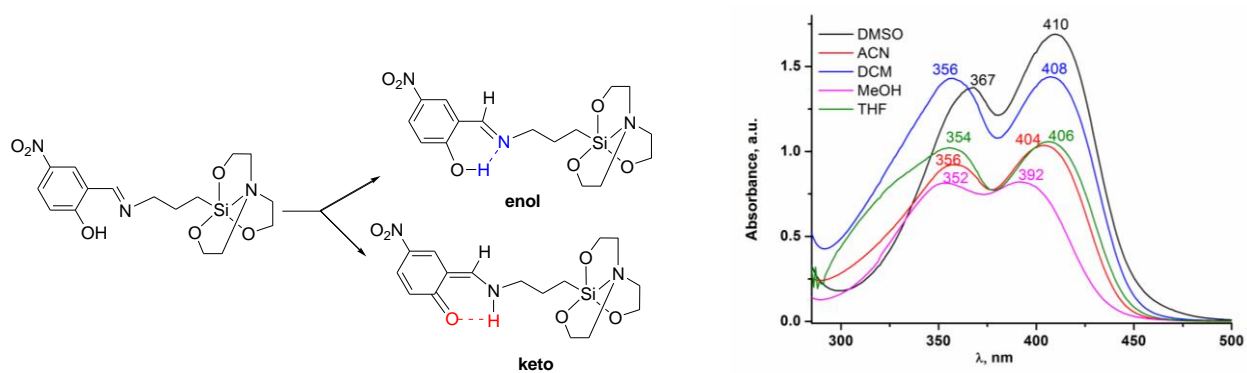

**Figure S7.** UV-vis spectra of the SIL-BS compound in solvents with different polarities showing the keto-enol tautomerism.

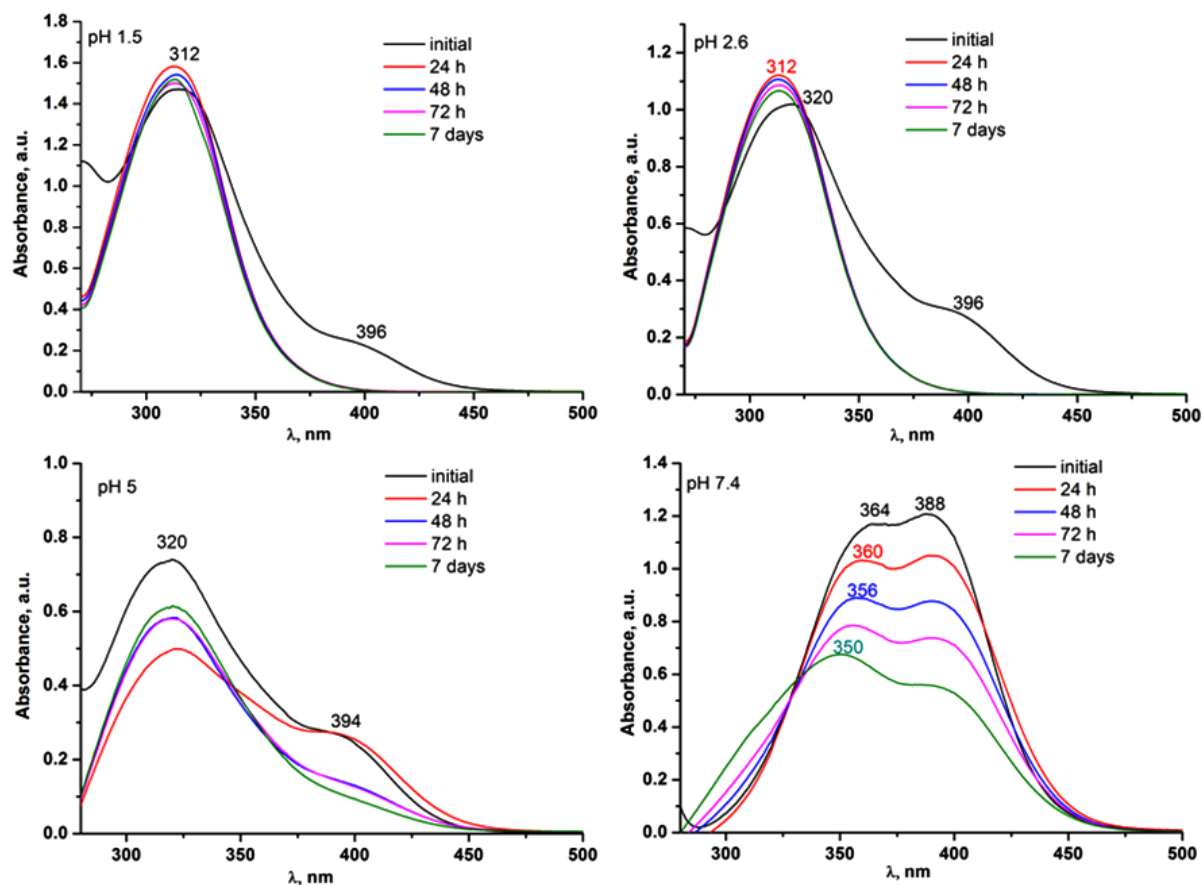

**Figure S8.** UV-vis spectra of SIL-BS in PBS (1% DMSO) at pH 1.5, 2.6, 5 si 7.4 during 7 days.

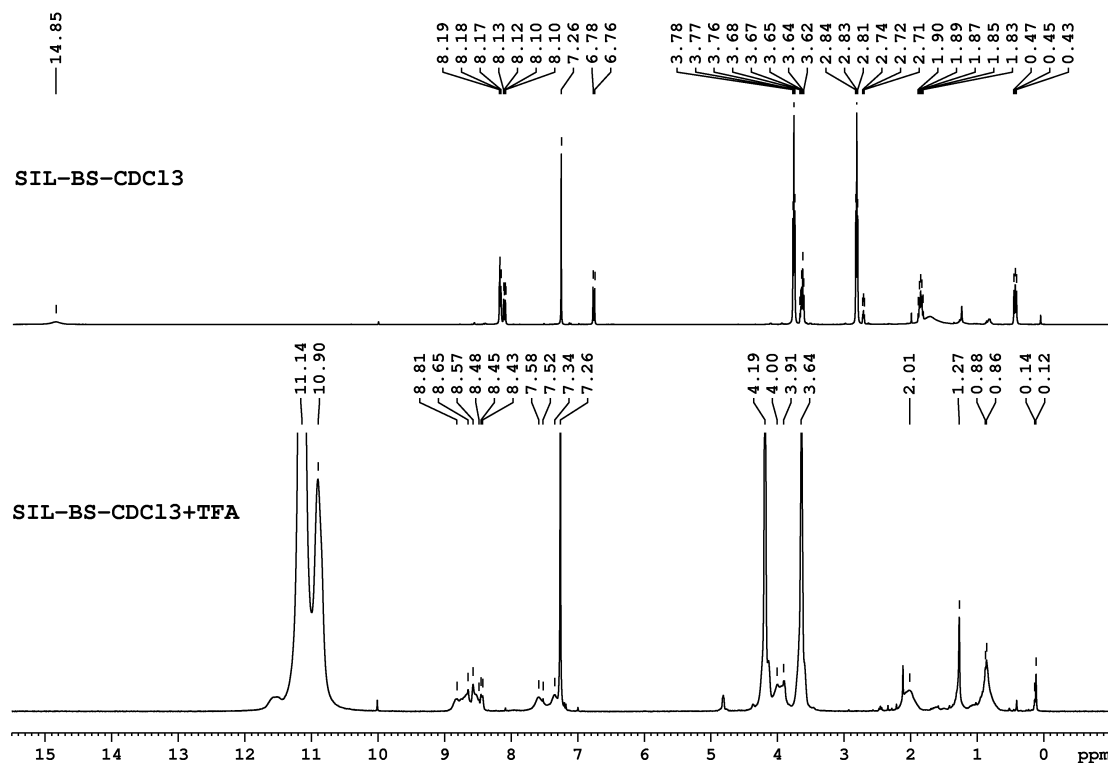

Figure S9.  $^1\text{H}$ NMR spectra of the SIL-BS at pH 1-4.

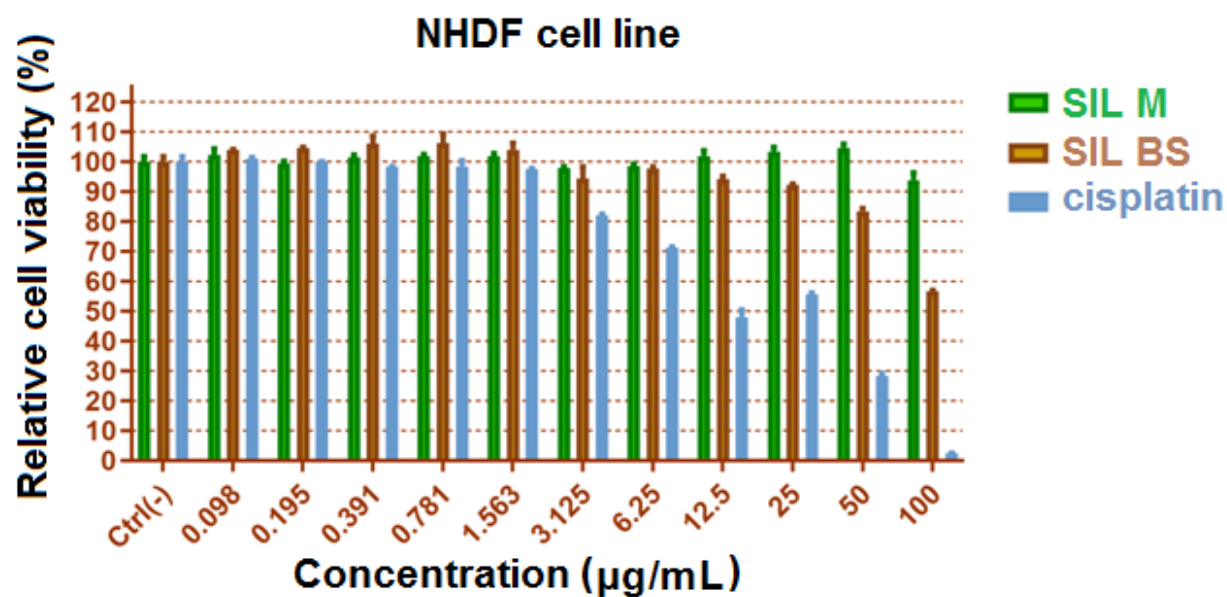

Figure S10. Cell viability of SIL M and SIL-BS on NHDF cell lines in comparison with cisplatin.

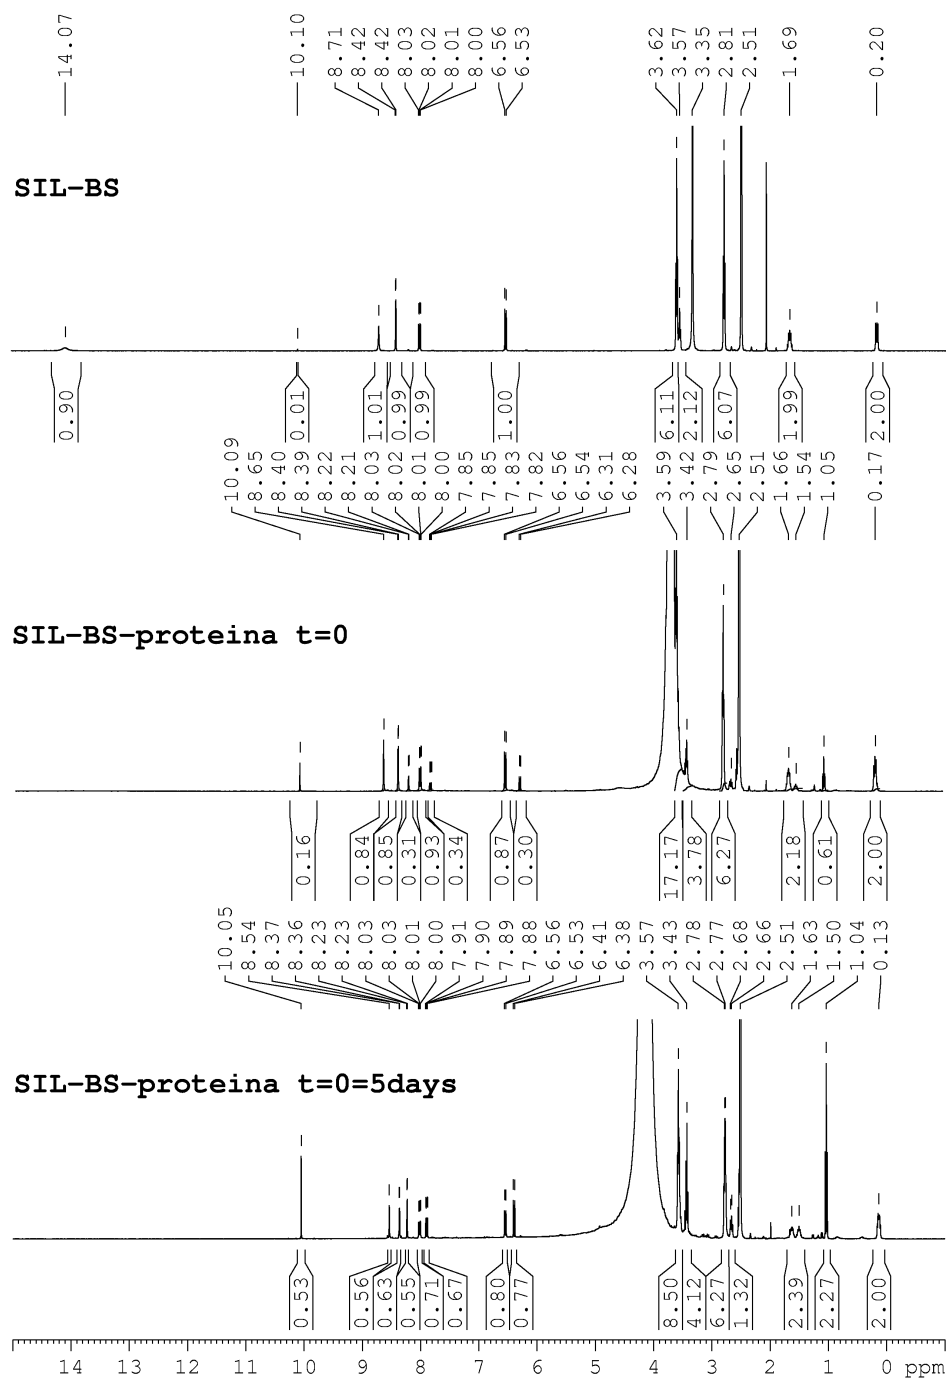

**Figure S11.**  $^1\text{H}$  NMR spectra of the SIL BS before, after the addition of protein (BSA) and after 5 days of incubation of the mixture.



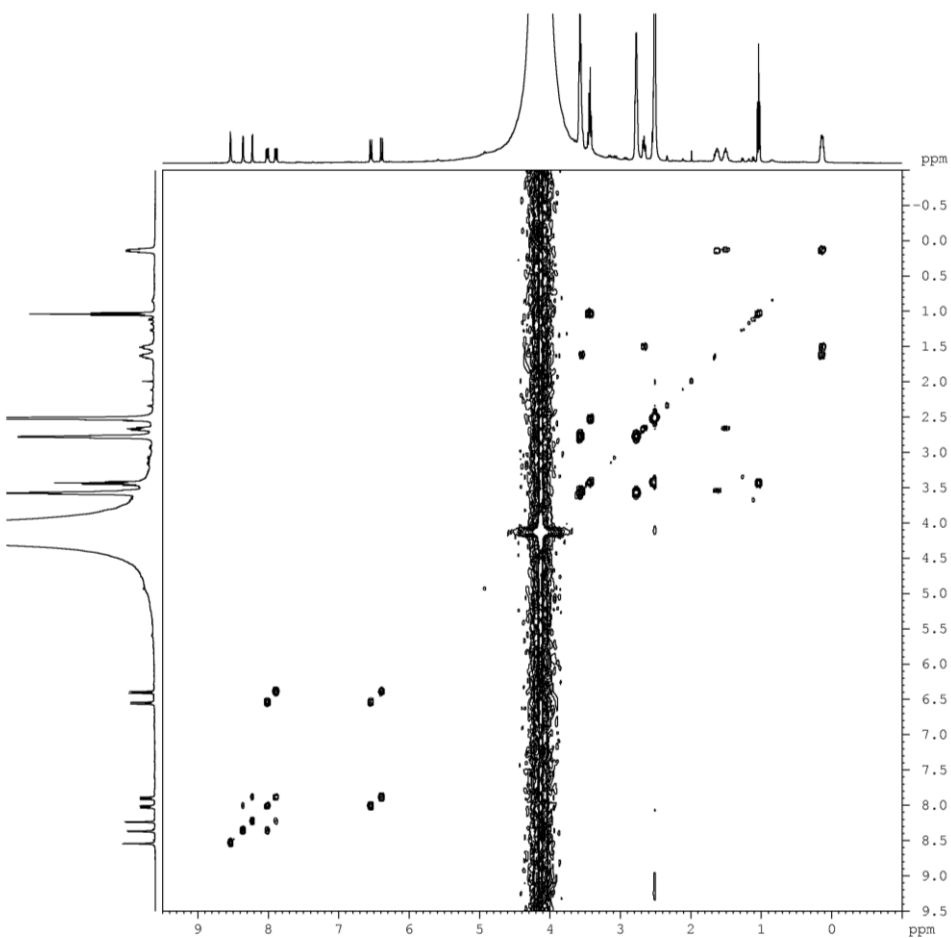

**Figure S12.**  $^1\text{H}$ ,  $^1\text{H}$  COSY NMR spectrum of SIL-BS/protein mixture.
